# Supplementary material
Source: publisher figshare collection journal article supplement (https://frontiersin.figshare.com/ndownloader/files/10774262)
Supplement: Supplementary file [file 10774262]

## Cholinergic activation enhances resistance to oral *Salmonella* infection by modulating innate immune defense mechanisms at the intestinal barrier

*Ray Al-Barazie<sup>1</sup>, Ghada Bashir<sup>2</sup>, Mohammed M. Qureshi<sup>1</sup>, Yassir A. Mohamed<sup>2</sup>, Ashraf Al-Sbie<sup>2</sup>, Saeed Tariq<sup>3</sup>, Wim Lammers<sup>4</sup>, Basel K. al-Ramadi<sup>2</sup> and Maria J. Fernandez-Cabezudo<sup>1</sup>*

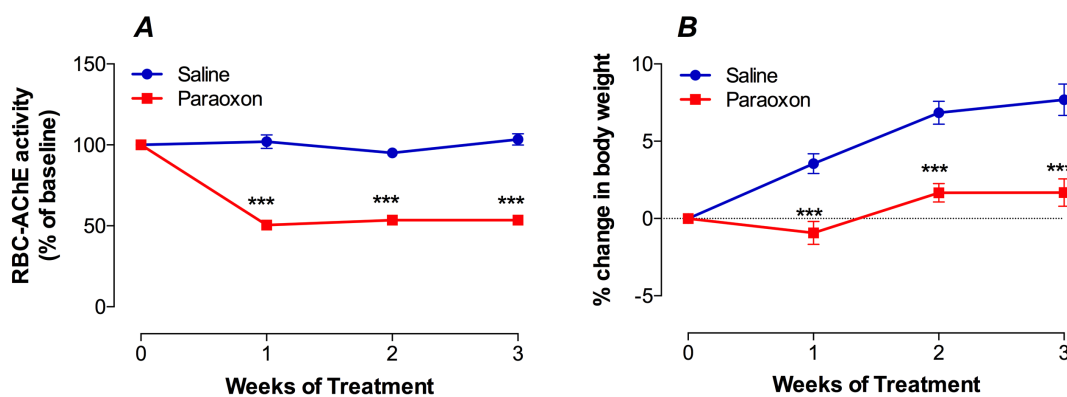

**Supplementary Figure 1. Paraoxon treatment reduces RBC AChE activity and slows body weight growth.** Mice were treated with paraoxon or saline for three weeks. (**A**) Blood was collected at the end of each week and enzyme activity was measured following modified Ellman's method. All enzyme activities were expressed in percentage of the baseline activity (100%). (**B**) Weekly change in body weight was calculated as percentage of the initial weight. All graphs represent the mean values  $\pm$  SEM of cumulative data from 3-4 independent experiments. Asterisks denote statistically significant differences between the control and experimental groups (\*\*\*)  $p < 0.001$ .

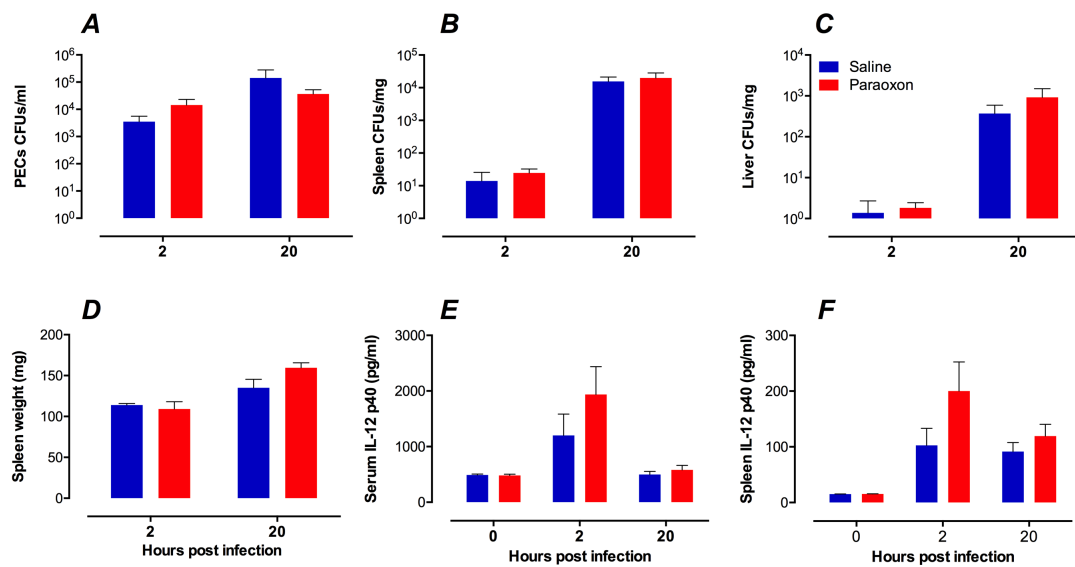

**Supplementary Figure 2. Effects of cholinergic stimulation on systemic infection with SL1344.** Mice treated with paraoxon or saline were infected i.p. with virulent Salmonella (strain SL1344;  $1.2 \times 10^3$ /mouse), and then sacrificed at the indicated time points. (**A**) Peritoneal fluid was harvested and bacterial loads determined as CFUs/ml. (**B**) Excised spleen and (**C**) liver were homogenized and bacterial loads were determined and calculated as CFUs/mg. (**D**) Spleen weights were also analyzed. (**E**) IL-12p40 content in serum and (**F**) splenocyte 24h-culture-supernatant was assayed by ELISA. Values represent the mean  $\pm$  SEM and are representative of 3 independent experiments.

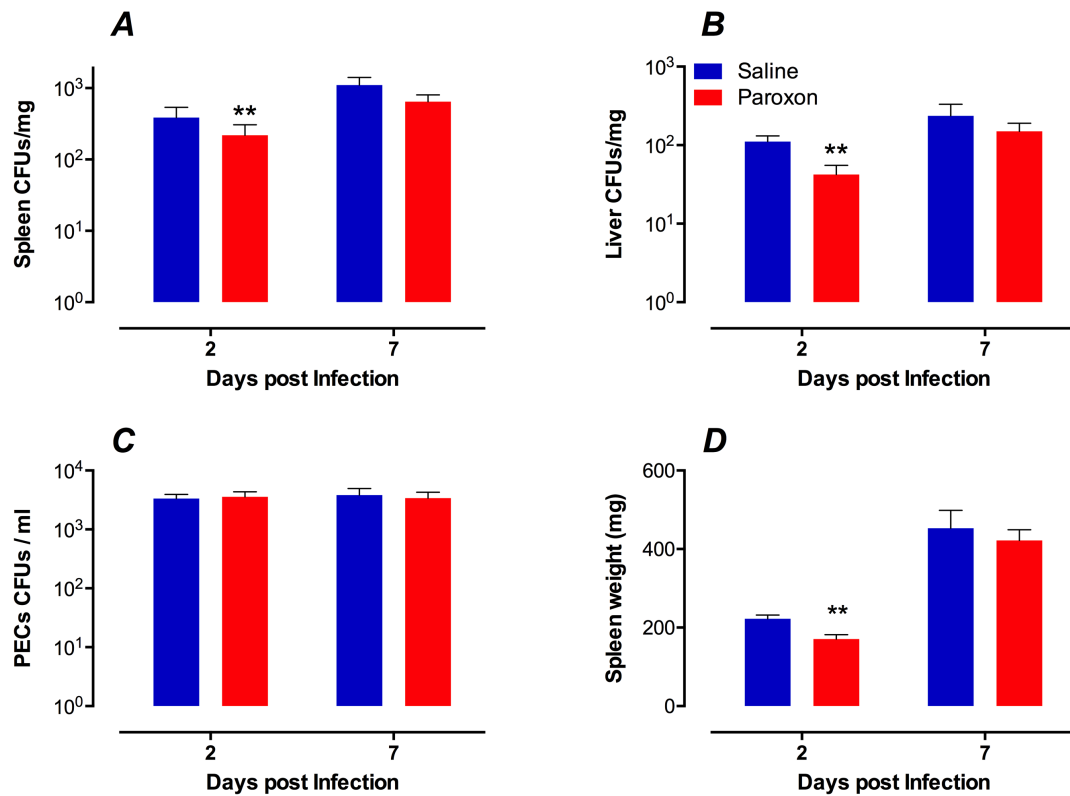

**Supplementary Figure 3. Bacterial load in PECs and target organs after systemic infection with BRD509E.** Mice pre-treated with paraoxon or saline were infected i.p. with attenuated Salmonella (strain BRD509E;  $2.5 \times 10^5$ /mouse) and sacrificed at days 2 or 7 post-infection. (A) Peritoneal fluid was retrieved and bacterial load determined as CFUs/ml. Bacterial load was also determined in (B) liver and (C) spleen as CFUs/mg. Figure (D) depicts spleen weights at the same time points. Each data point represents the mean  $\pm$  SEM of cumulative data from 3-5 independent experiments. Asterisks denote statistically significant differences between control and experimental group at each time point (\*\* $p \leq 0.01$ ).

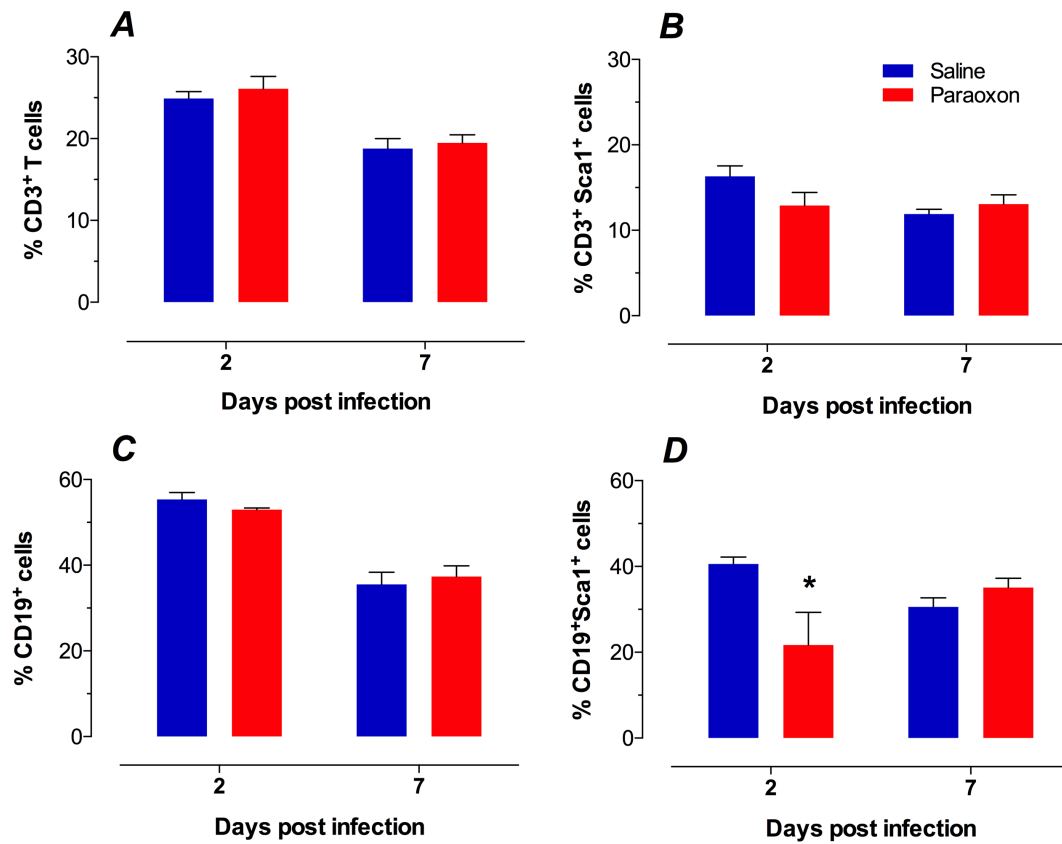

**Supplementary Figure 4. Flowcytometric analysis of splenocytes after systemic infection with BRD509E.** Mice were treated for three weeks with paraoxon or saline, and then infected i.p. with BRD509E ( $2.5 \times 10^5$ ). Mice were sacrificed at the indicated time points. Erythrocytes-depleted splenocytes were analyzed by flowcytometry using specific mAbs. Graphs **A-D** depict percentages of (**A**) total T cells (CD3<sup>+</sup>), (**B**) activated T cells (CD3<sup>+</sup>/Sca-1<sup>+</sup>), (**C**) total B cells (CD19<sup>+</sup>) and (**D**) activated B cells (CD19<sup>+</sup>/Sca-1<sup>+</sup>). Data represent the mean values  $\pm$  SEM from a representative of 2 independent experiments. Asterisks denote statistically significant differences between control and experimental group at each time point (\* p < 0.05).

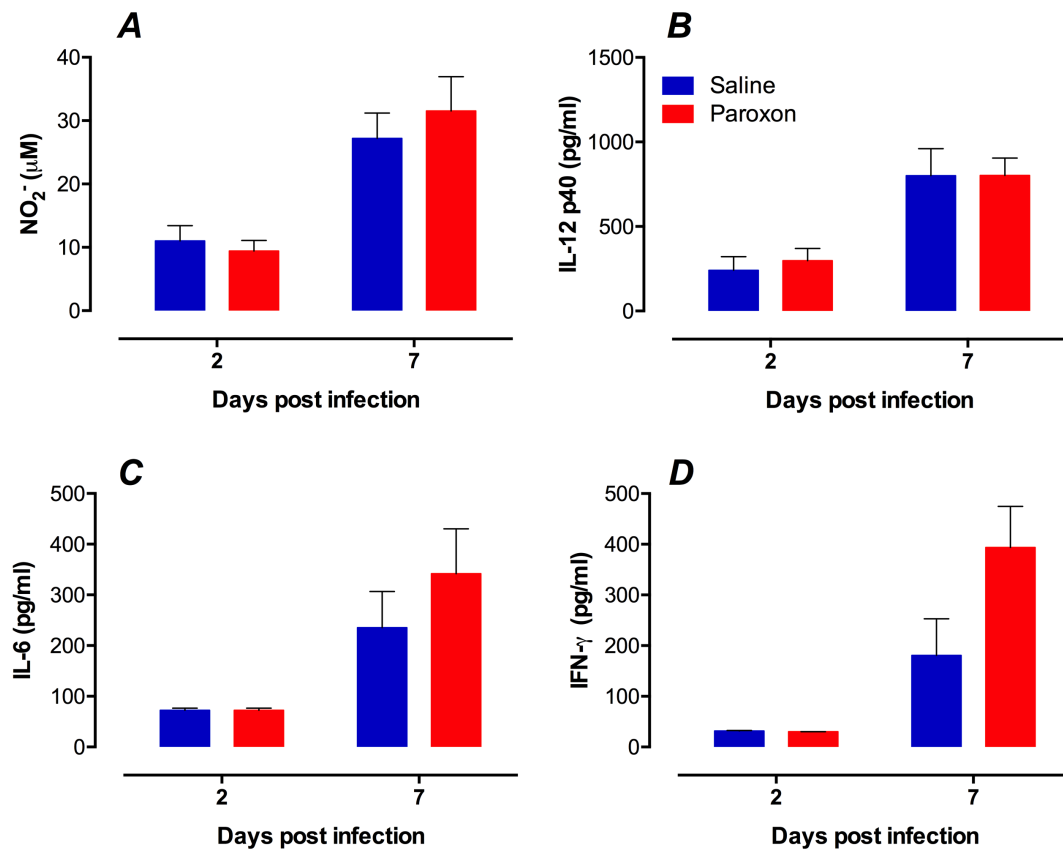

**Supplementary Figure 5. Functional response of spleen cells following systemic infection with BRD509E.** Following exposure to saline or paraoxon, mice were infected by i.p. administration of BRD509E ( $2.5 \times 10^5$ ) and sacrificed at day 2 or 7 post-infection. Spleen single cell suspensions were cultured, and 48-hour-culture supernatants analyzed for (A) nitrite content and (D) IFN- $\gamma$ . 24 hour-supernatants were assayed for (B) IL-12p40 and (C) IL-6. Graphs depict mean  $\pm$  SEM from 2-3 independent experiments.
